# Supplementary material
Source: PubMed Central journal article supplement (PMC4252736)

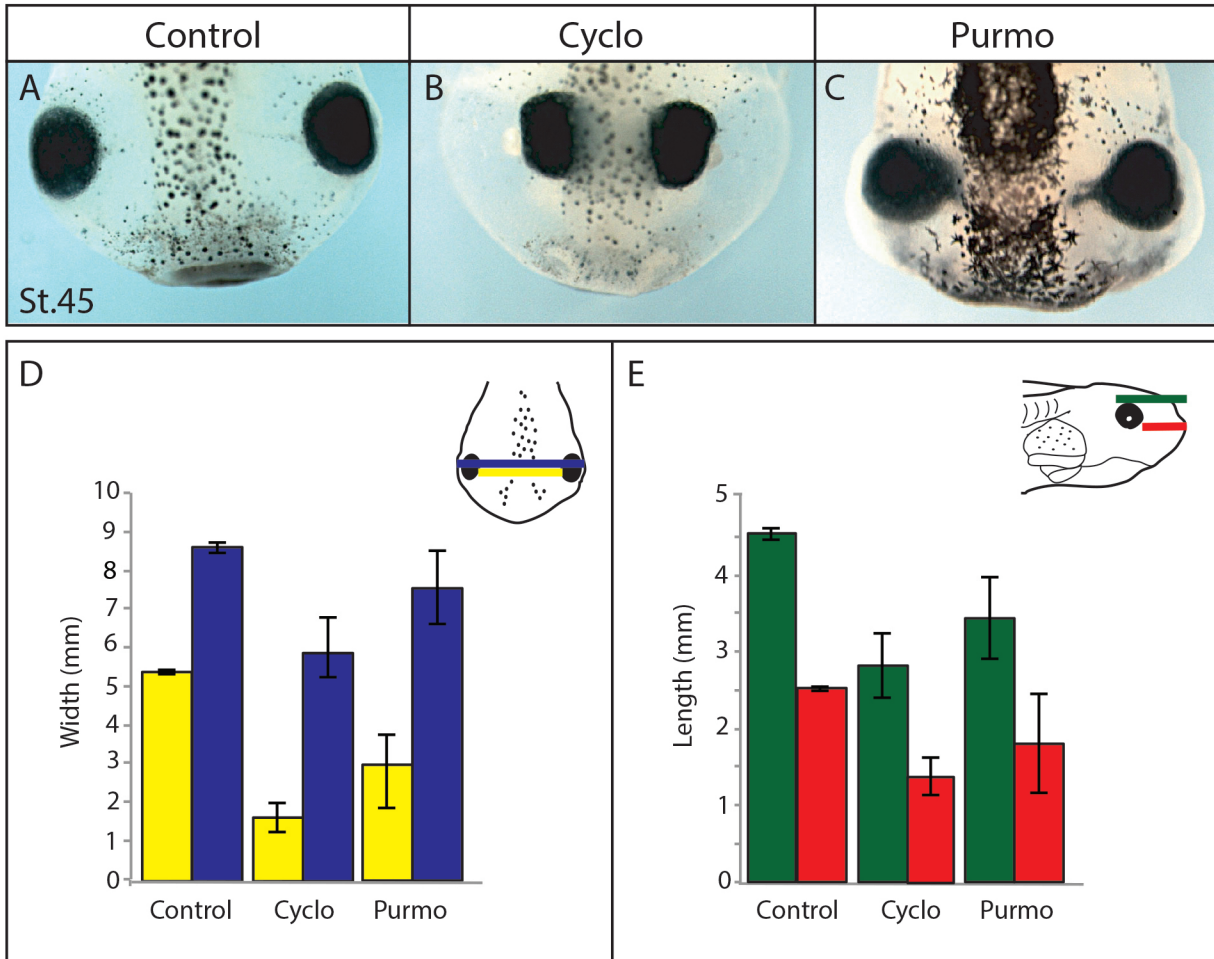

Tabler et al. 2014  
Supplemental Figure. 1

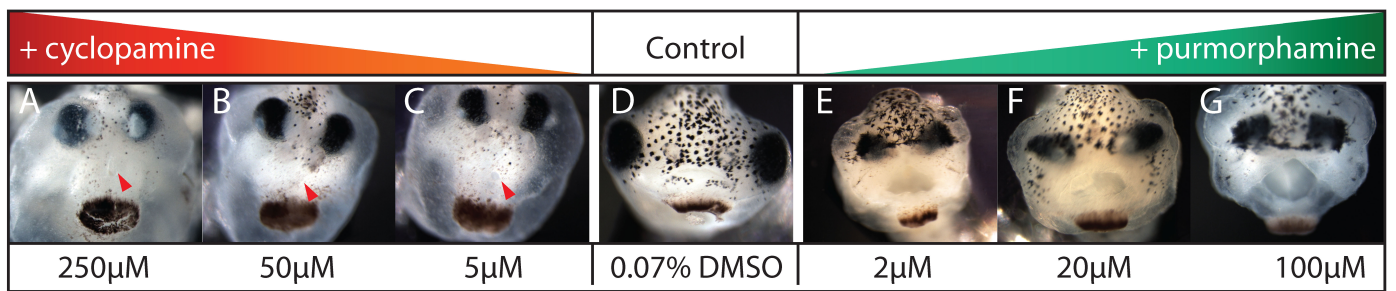

Tabler et al. 2014  
Supplemental figure 2

Supplement: NIHMS636500-supplement-Supplemental_figures.pdf [file NIHMS636500-supplement-Supplemental_figures.pdf]
